# Supplementary material for: Interaction between hepatitis B virus infection and the efficacy of camrelizumab in combination with apatinib therapy in patients with hepatocellular carcinoma: a multicenter retrospective cohort study
Source: PubMed Central journal article supplement — Ann Transl Med. 2021 Sep;9(18):1412. doi: 10.21037/atm-21-3020 (PMC8506751; doi:10.21037/atm-21-3020), 2021-09
Supplement: atm-09-18-1412-dss.pdf [file atm-09-18-1412-dss.pdf]

## Data Sharing Statement

|                     |                                                                                                                                                     |                                                                                                                                                     |
|---------------------|-----------------------------------------------------------------------------------------------------------------------------------------------------|-----------------------------------------------------------------------------------------------------------------------------------------------------|
| <b>Article Info</b> | https://dx.doi.org/10.21037/atm-21-3020                                                                                                             |                                                                                                                                                     |
| <b>Item</b>         | <b>Question</b>                                                                                                                                     | <b>Authors' Response<br/>(place "-" if not applicable)</b>                                                                                          |
| 1                   | Would you like to share data collected for your study to others?                                                                                    | Yes.                                                                                                                                                |
| 2                   | If not, would you like to share the reason for your decision?                                                                                       | -                                                                                                                                                   |
| 3                   | What data in particular will be shared?                                                                                                             | The HBV loads and tumor responses data in particular will be shared.                                                                                |
| 4                   | Any other documents will be shared? Such as study protocol, statistical analysis plan, informed consent form, clinical study report, analytic code. | Statistical analysis plan, informed consent form, and clinical study report will also be shared if requested.                                       |
| 5                   | When will data availability begin?                                                                                                                  | From the publication date.                                                                                                                          |
| 6                   | When will data availability end?                                                                                                                    | One years within the publication date, since the technique or survival date may be updated over time.                                               |
| 7                   | To whom will you share the data?                                                                                                                    | Medical oncologists who are interested in studies of HBV reactivation during anti-PD-1 therapy.                                                     |
| 8                   | For what type of analysis or purpose?                                                                                                               | For analysis to evaluate the interaction between hepatitis B virus infection and the efficacy of camrelizumab in combination with apatinib therapy. |
| 9                   | How or where can the data/documents be obtained?                                                                                                    | Emails could be sent to the address below to obtain the shared data:<br>guoshengyuan1991@163.com                                                    |
| 10                  | Any other restrictions?                                                                                                                             | We may balance the potential benefits and risks for each request and then provide the data that could be shared.                                    |
